# Supplementary material for: Administration of AMD3100 in endotoxemia is associated with pro-inflammatory, pro-oxidative, and pro-apoptotic effects in vivo
Source: PubMed Central journal article supplement (PMC5048674; doi:10.1186/s12929-016-0286-8), 2016-10-03

### A Protein content in the liver

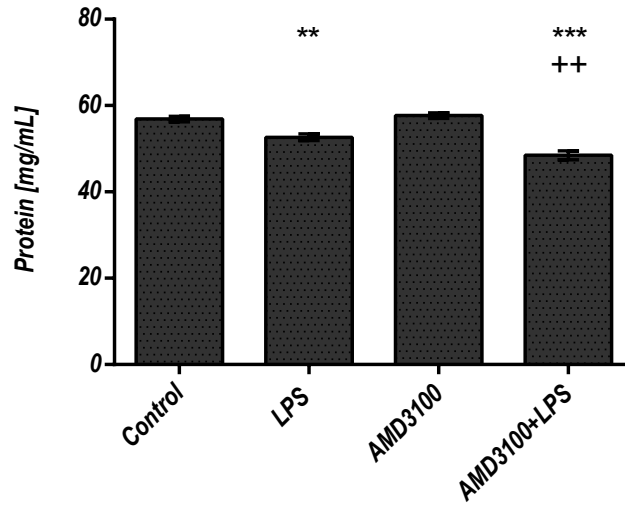

### B Serum creatinine

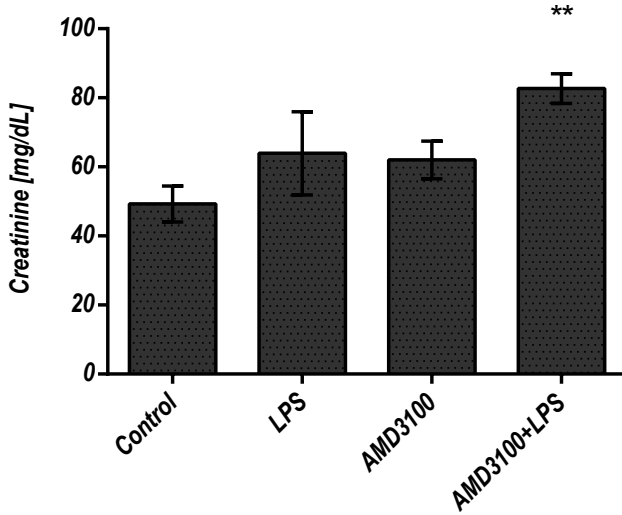

### C Serum urea

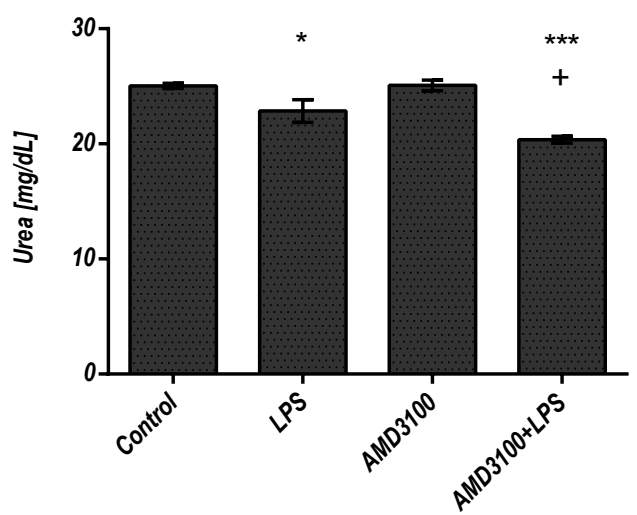

### D TNF-α assay with THP-1 monocytes

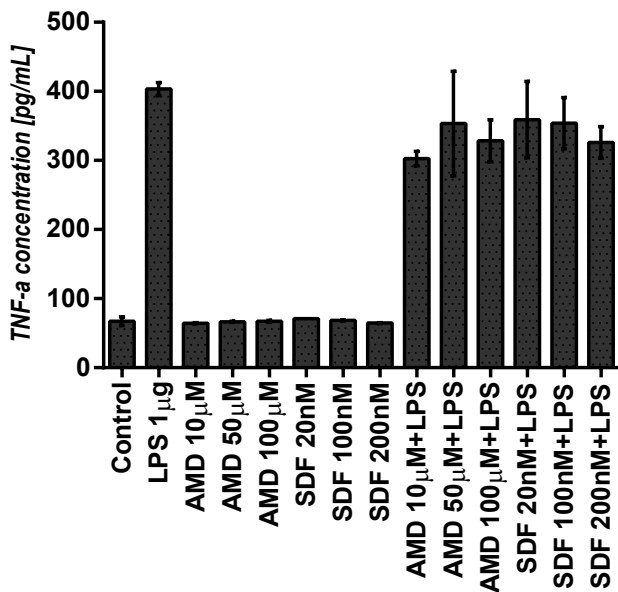

### E TNF-α assay with THP-1 macrophages

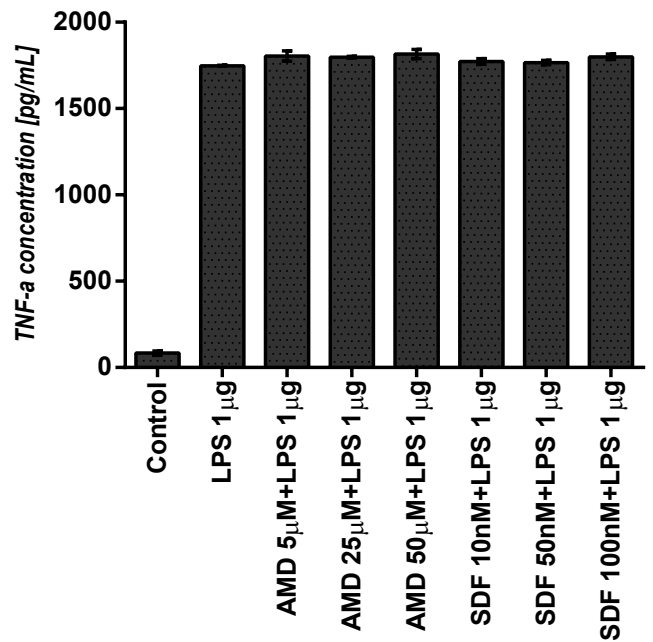

Supplement: 12929_2016_286_MOESM1_ESM.pdf [file 12929_2016_286_MOESM1_ESM.pdf]
